# Supplementary material for: Myeloid cell TNFR1 signaling dependent liver injury and inflammation upon BCG infection
Source: PubMed Central journal article supplement (PMC6438980; doi:10.1038/s41598-019-41629-9), 2019-03-28
Supplement: 41598_2019_41629_MOESM1_ESM.pdf [file 41598_2019_41629_MOESM1_ESM.pdf]

## **Supplementary data**

### **Myeloid cell TNFR1 signaling dependent liver injury and inflammation upon BCG infection**

Leslie Chavez-Galan, Dominique Vesin, Guillaume Blaser, Husnu Uysal, Sulayman Benmerzoug, Stéphanie Rose, Bernhard Ryffel, Valérie F. J. Quesniaux, and Irene Garcia

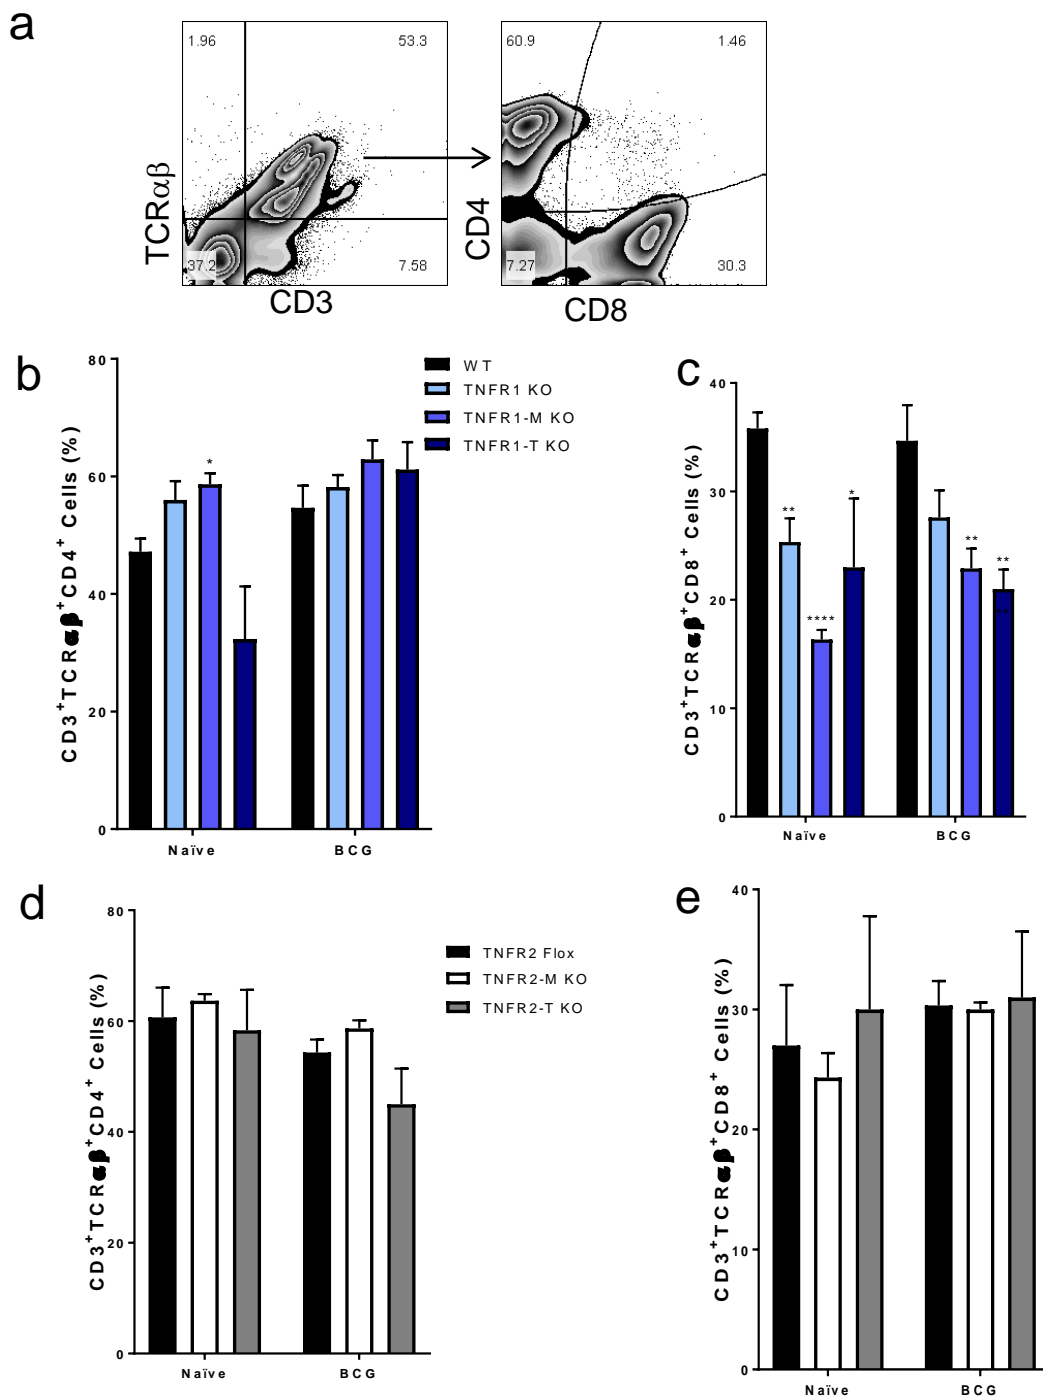

**Supplementary Fig. S1. CD8+ T cell recruitment is affected by depletion of TNFR1 in BCG-infected mice.** (a) Representative zebra plot showing liver cells from WT mice at 2-weeks infection, we delimited the gate of CD3+TCRαβ+ (T cells) and inside this gate evaluated the expression of CD4 and CD8. (b and c, respectively) The frequency of the subpopulations CD4 and CD8 T cell in naïve littermates and at 2-weeks post-infection of WT, TNFR1 KO, TNFR1-M KO, TNFR1-CD4 KO. (d and e, respectively) The frequency of the subpopulations CD4 and CD8 T cell in naïve littermates and at 2-weeks post-infection of TNFR2-Flox, TNFR2-M KO and TNFR2-T KO. Results are representative of three independent experiments. Bar graphs shown mean +/- SEM (B-G). n= 3 to 9 mice per group. \*p<0.05, \*\*p<0.01 versus WT, Multiple t test and Bonferroni-Dunn were used to multiple comparison.

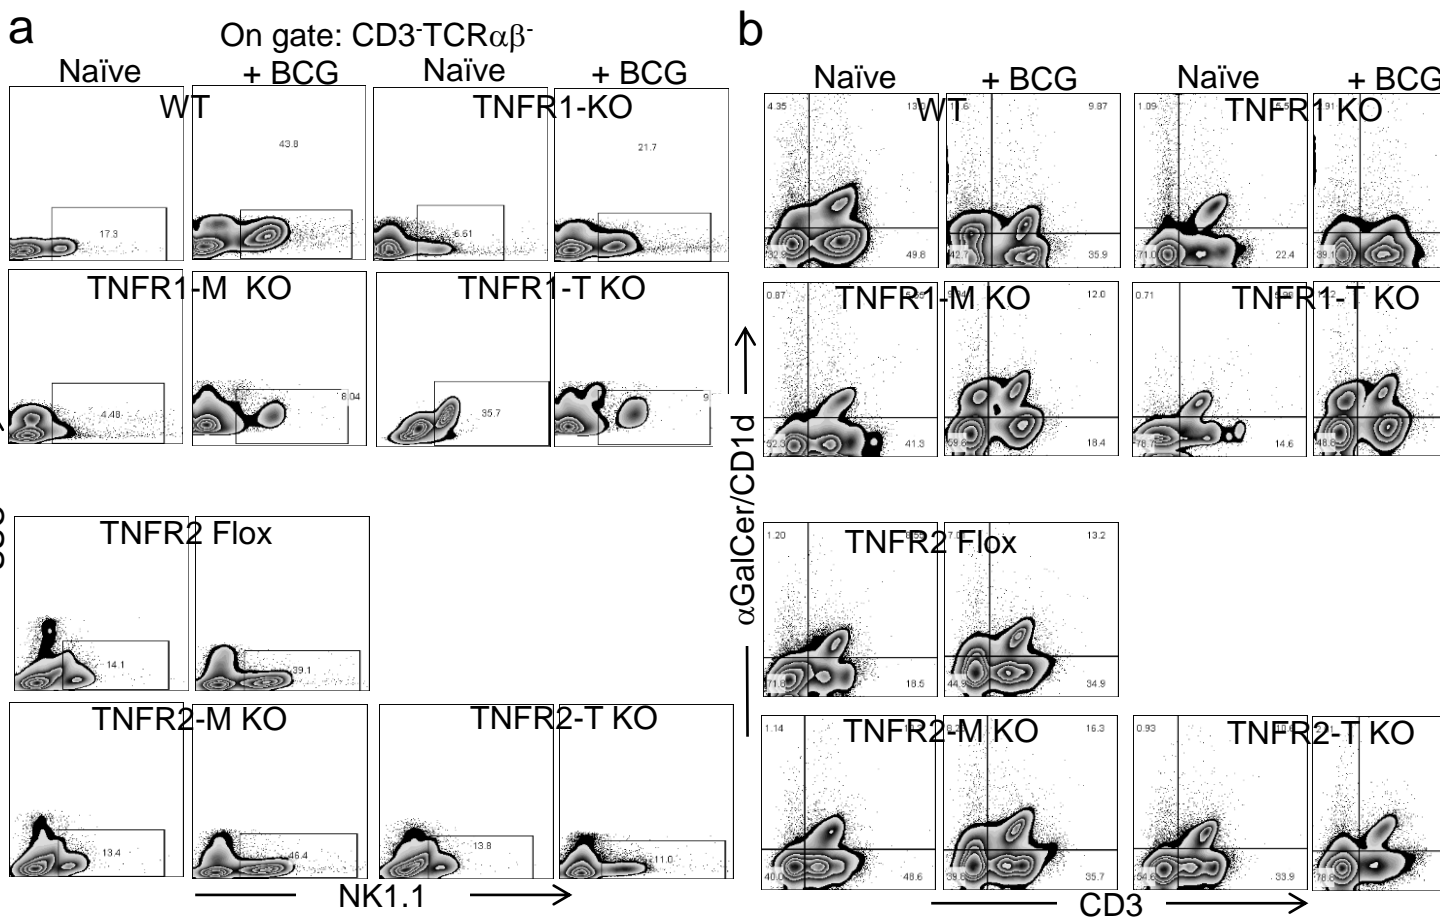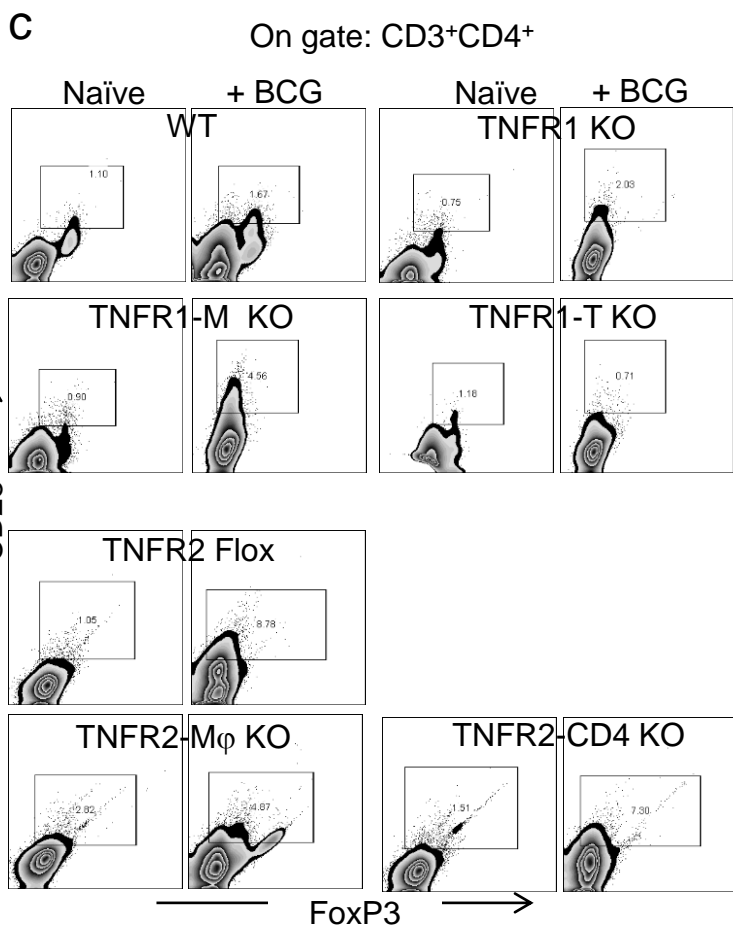

**Supplementary Fig. S2. Strategy of analysis to characterize NK, NKT and Tregs cells.** Liver cells from WT, TNFR1 KO, TNFR1-M KO, TNFR1-T KO, TNFR2-Flox, TNFR2-M KO and TNFR2-T KO mice by flow cytometry. Representative zebra plot showing liver cells from naïve littermates at 2-weeks infection post-infection. **(a)**. To identify NK cells, we delimited the gate of CD3-TCR $\alpha\beta$ - and inside this gate, evaluated the expression of NK1.1 **(b)**. NKT cells evaluated as double positive cells for CD3 and the tetramer  $\alpha$ GalCer/CD1d. **(c)**. To characterize Tregs cells, we delimited in the gate of CD3+CD4+ and inside this gate, evaluated the expression of CD25 and FoxP3

**a**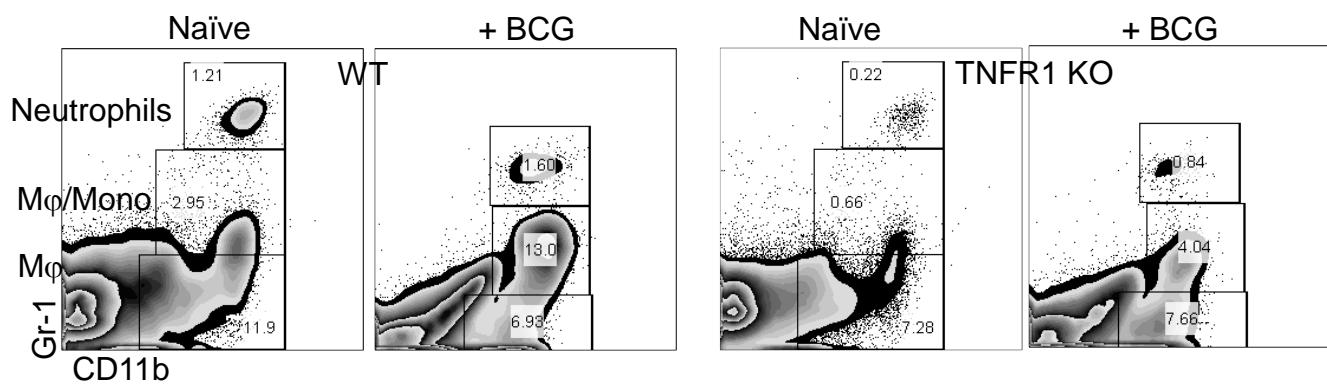**b**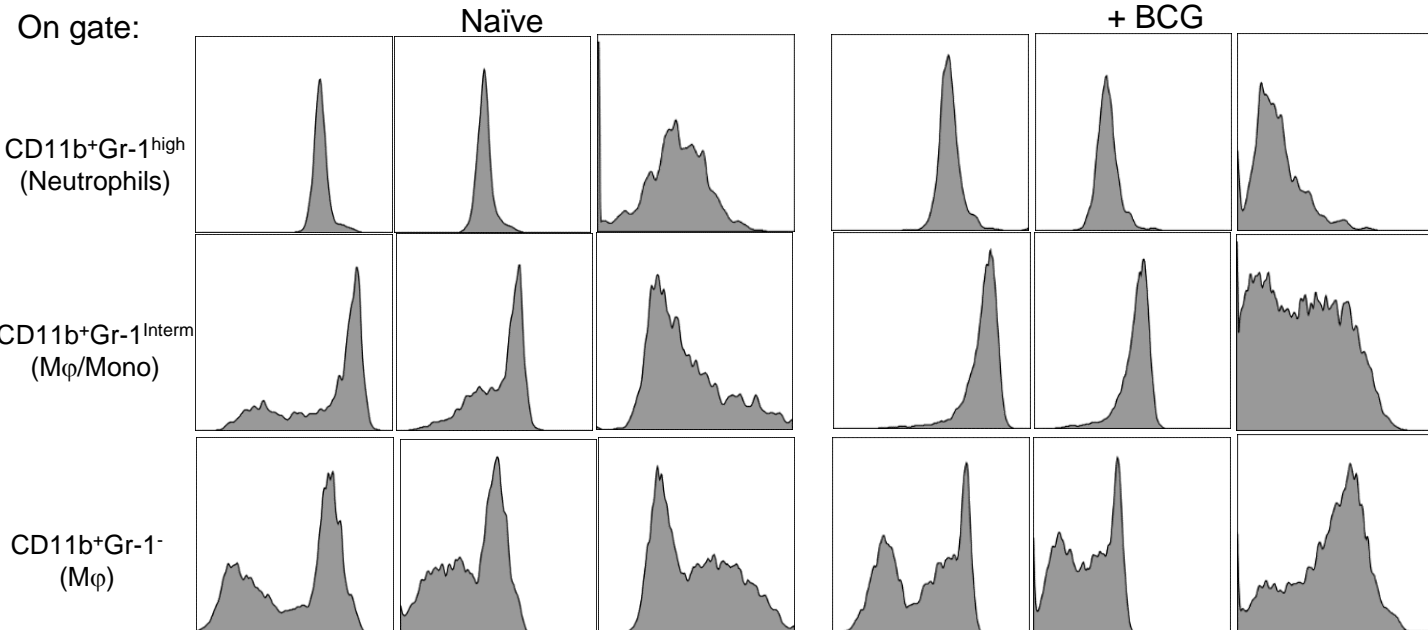**c**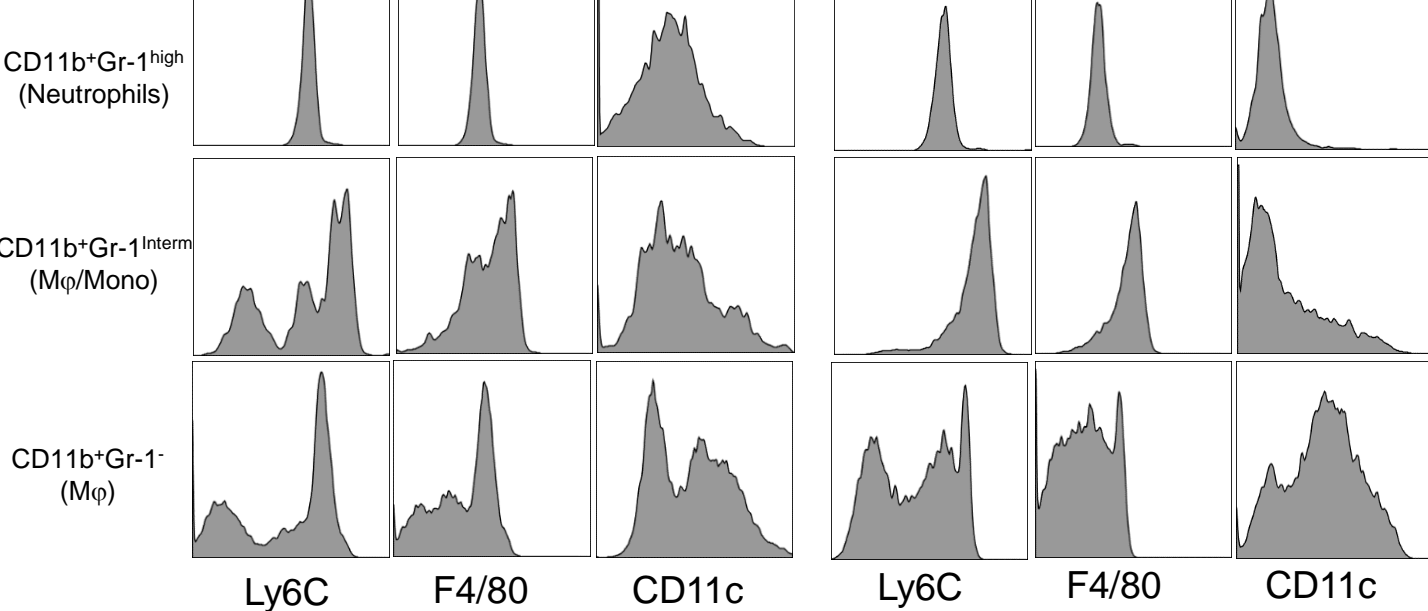

**Supplementary Fig. S3. Phenotypical characterization of myeloid cells among mononuclear liver cells.**(a) Representative zebra plot showing liver cells in naïve littermates and at 2-weeks infection from WT and TNFR1 KO mice, liver myeloid subsets were identified by CD11b and Gr-1 expression. (b) Inside the gate of Neutrophils (CD11b<sup>+</sup>Gr-1<sup>high</sup>), M $\phi$ /Mono (CD11b<sup>+</sup>Gr-1<sup>Interm</sup>) and Macrophages (M $\phi$ ) (CD11b<sup>+</sup>Gr-1<sup>-</sup>) the expression of Ly6C, F4/80 and CD11c were evaluated for both WT and TNFR1 KO mice (b and c, respectively). Results are representative of at least three independent experiments.

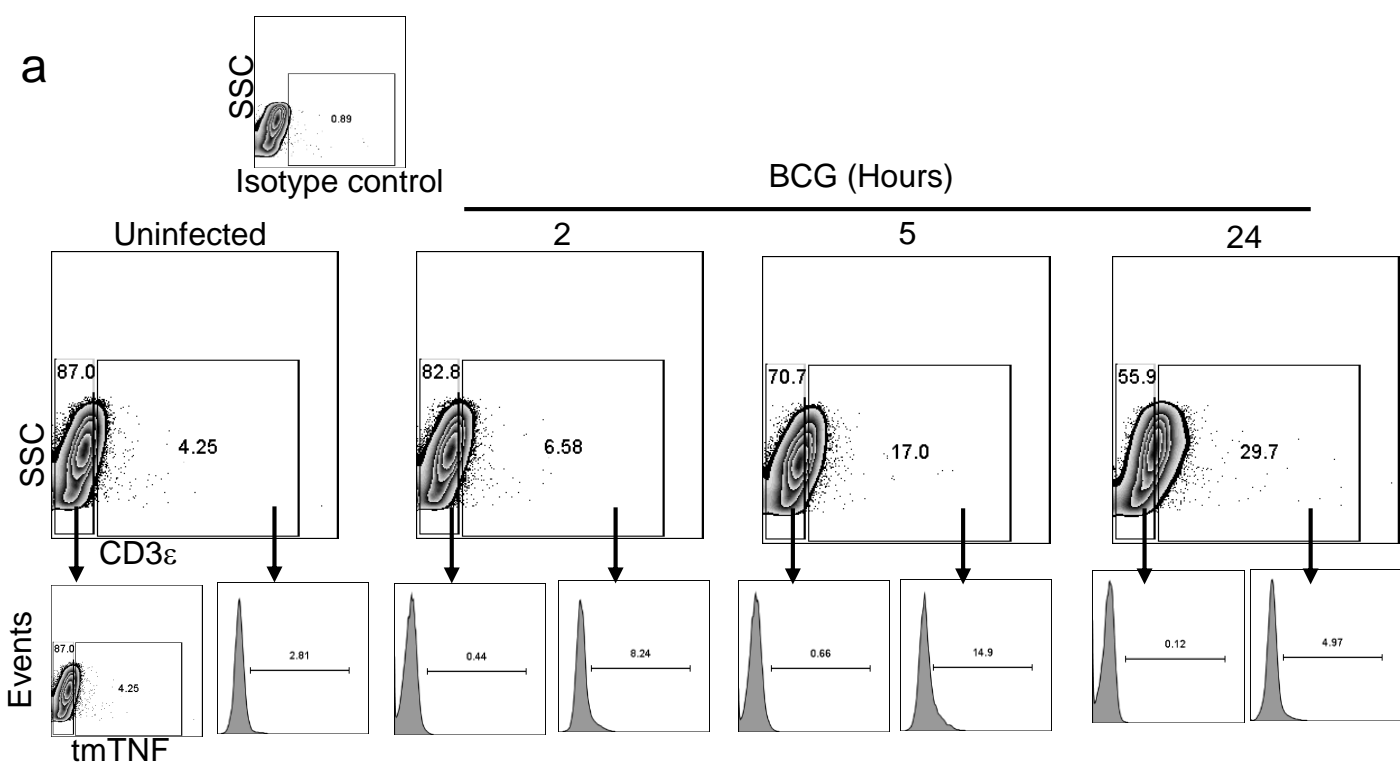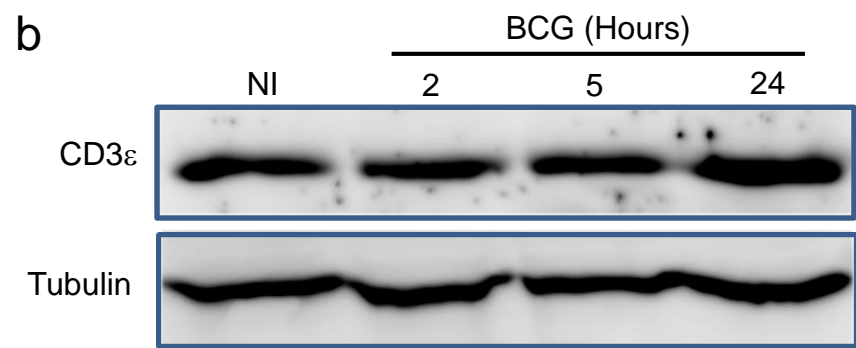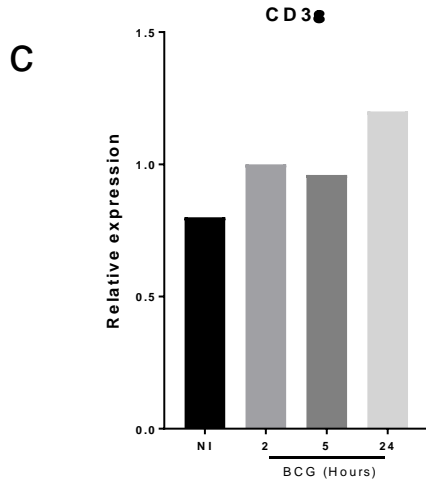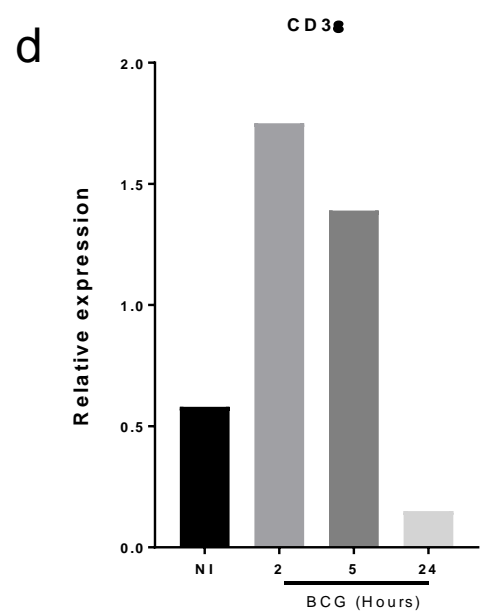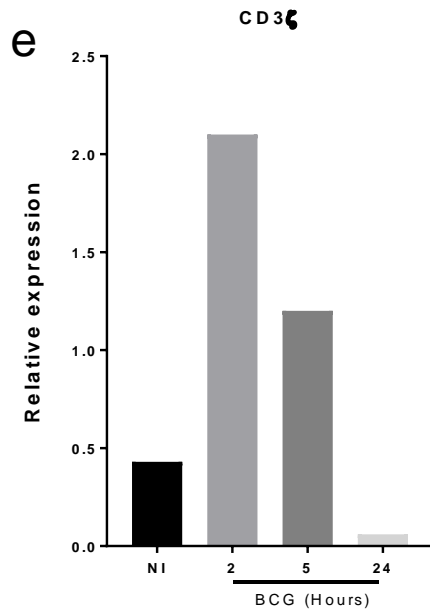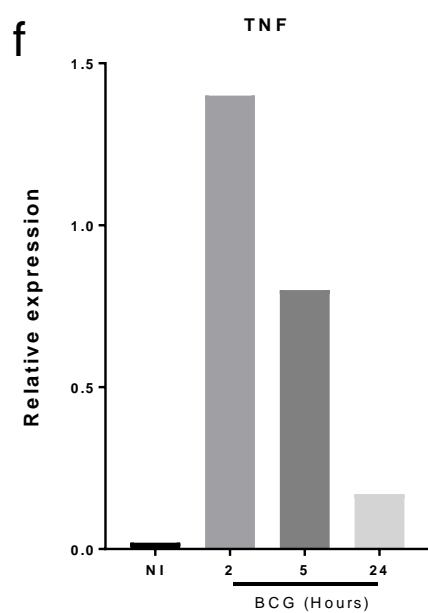

**Supplementary Fig. S4. BCG infection increases CD3 and TNF expression at the protein and transcriptional level in RAW cells.** (a) RAW cells were infected with BCG MOI 0.5 during 2, 5 and 24 hours, and prepared to flow cytometry, western blot and RNA extraction. Representative zebra plot showing CD3 $\epsilon$  expression and histograms display the mean fluorescence intensity (MFI) of TNF inside gate CD3 $^-$  and CD3 $^+$ . (d, e and f, respectively). (b) Protein from infected RAW cells prepared for western blot. Representative western blot for CD3 $\epsilon$  and tubulin as loading control. (c) Band density of CD3 $\epsilon$  normalized with tubulin by densitometry RNA was obtained from BCG-infected RAW cells, the CD3 $\epsilon$ , CD3 $\xi$  and TNF relative gene expression was evaluated by real-time PCR. Figure representative of 3 independent experiments.



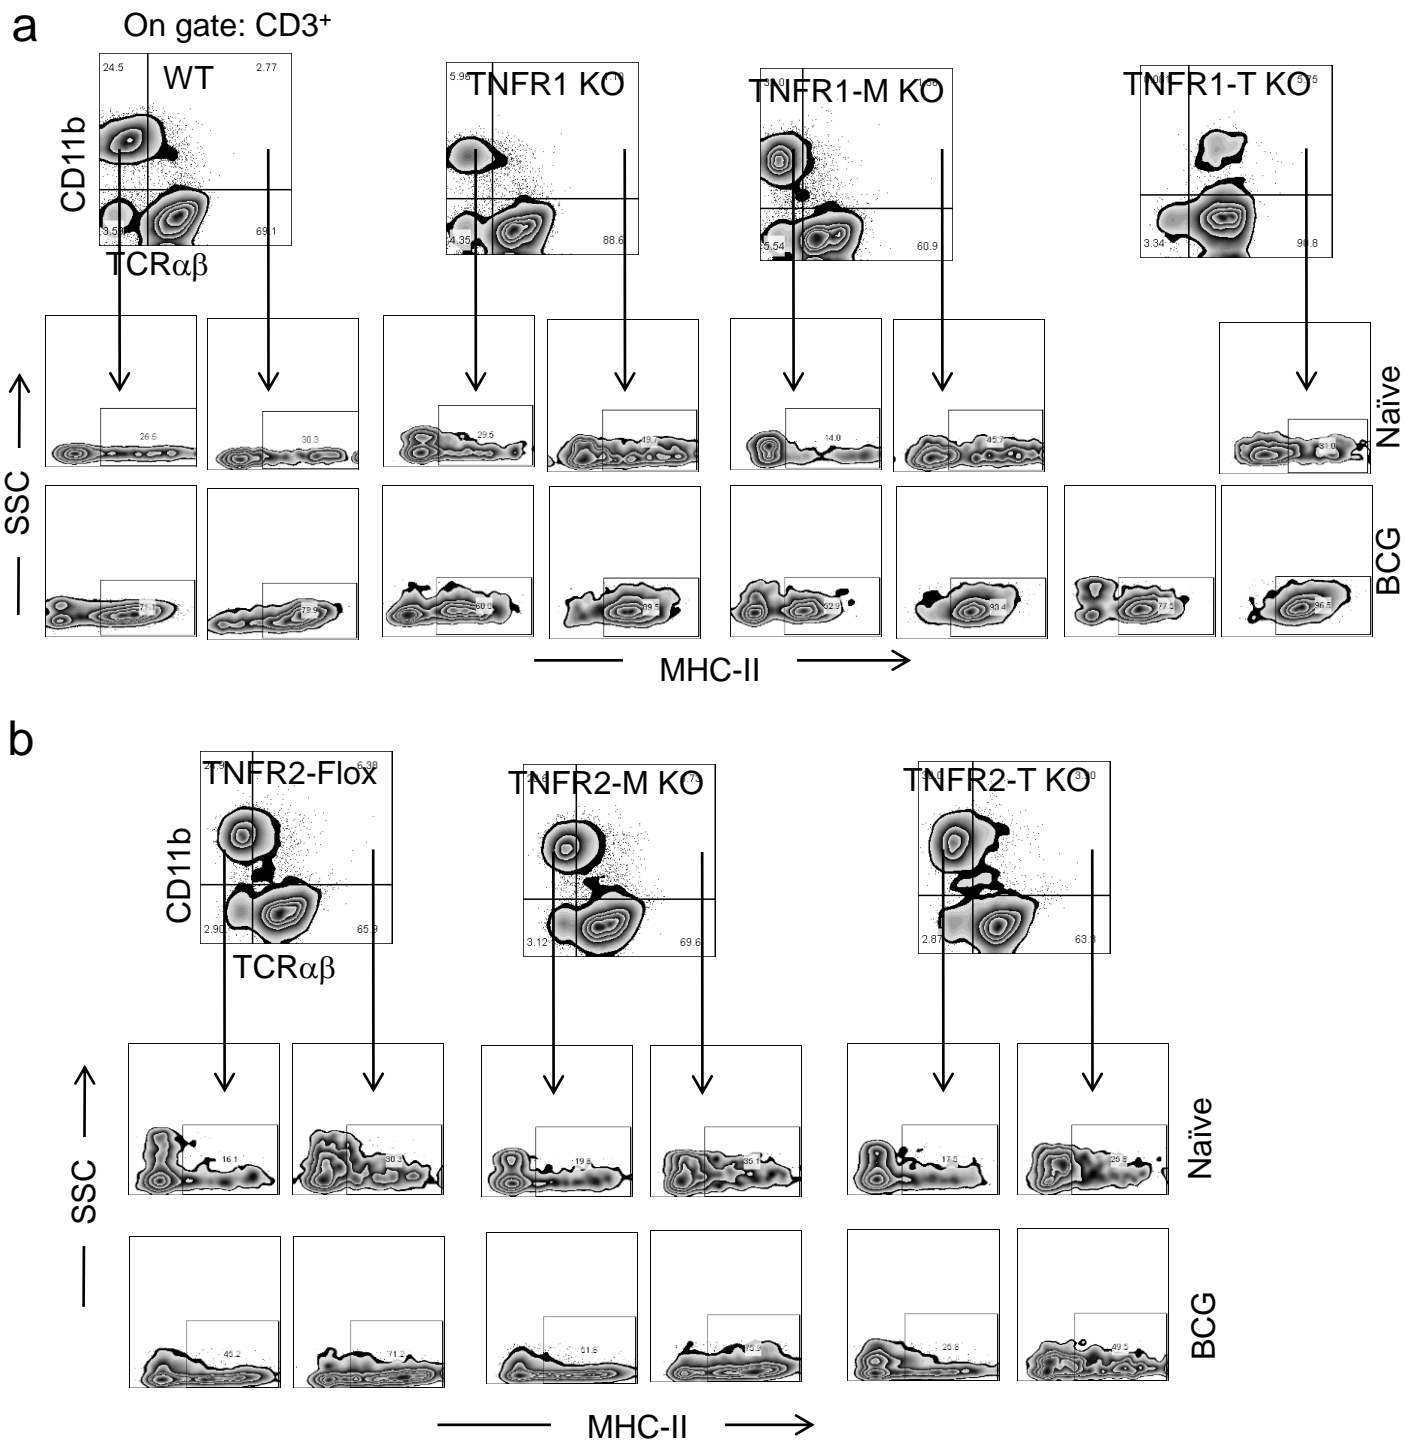

**Supplementary Fig. S5. MHC-II expression on CD3<sup>+</sup>CD11b<sup>+</sup>TCR $\alpha\beta$ <sup>-</sup> and CD3<sup>+</sup>CD11b<sup>+</sup>TCR $\alpha\beta$ <sup>+</sup> cells in liver cells.** (a) Representative zebra plot showing liver cells in naïve littermates and at 2-weeks infection. Previous gate for CD3 was done, posteriorly, CD11b and TCR $\alpha\beta$  was identified, inside gate for CD3<sup>+</sup>CD11b<sup>+</sup>TCR $\alpha\beta$ <sup>-</sup> and CD3<sup>+</sup>CD11b<sup>+</sup>TCR $\alpha\beta$ <sup>+</sup> cells frequency of MHC-II<sup>+</sup> cells was evaluated in WT, TNFR1 KO, TNFR1-M KO and TNFR1-T KO or (b) TNFR2-Flox, TNFR2-M KO and TNFR2-T KO mice. Results are representative of at least three independent experiments.

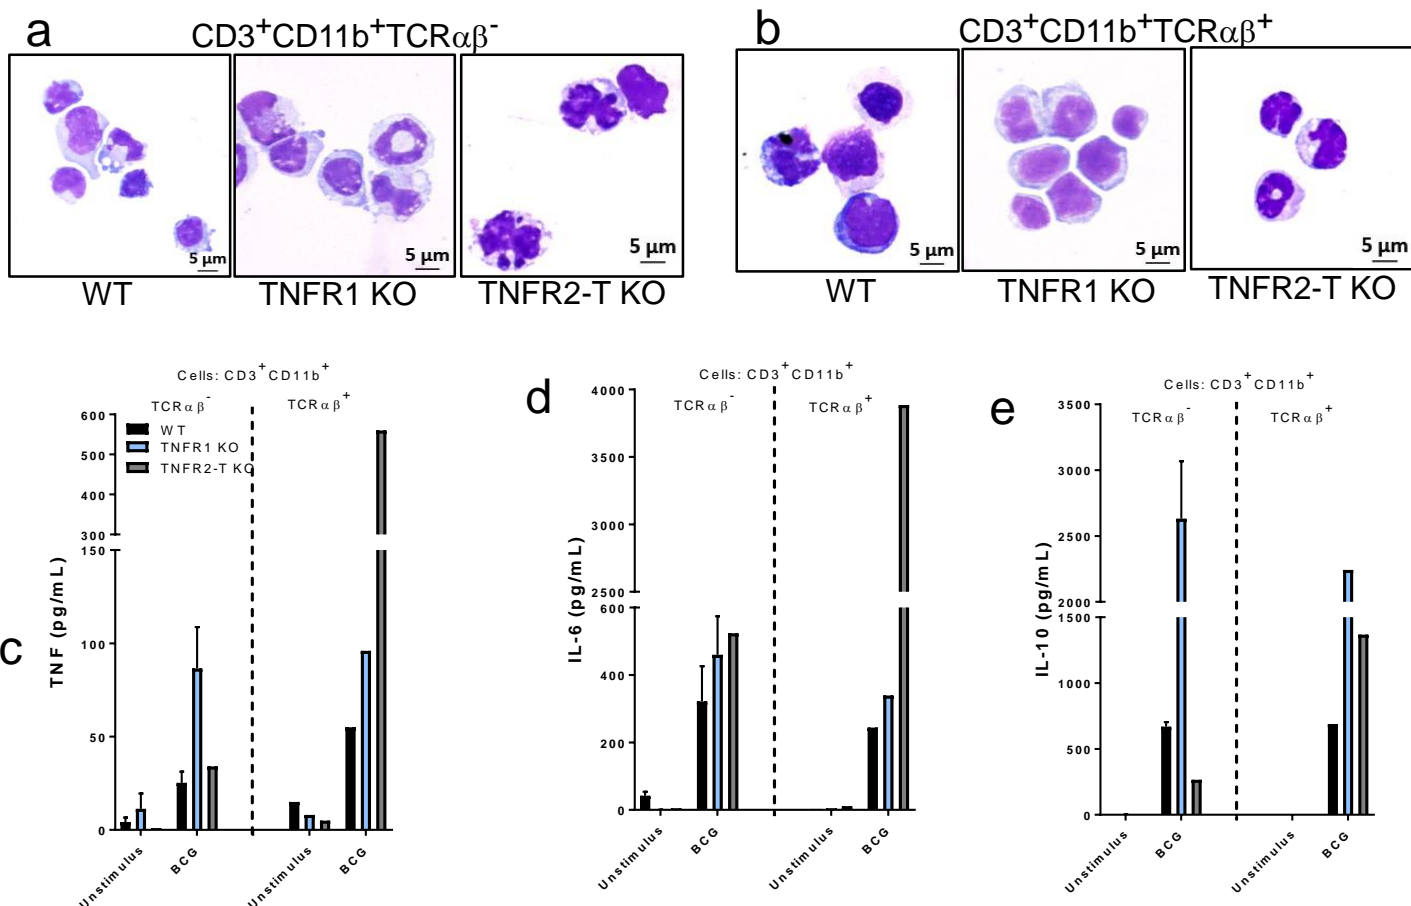

**Supplementary Fig. S6.  $CD3^+$  myeloid cells are able to produce cytokines after re-activation with BCG.** (a and b) Liver cells from WT, TNFR1 KO and TNFR2-T KO were obtained and prepared for sorting. Sorted by flow cytometry  $CD3^+CD11b^+TCR\alpha\beta^-$  and  $CD3^+CD11b^+TCR\alpha\beta^+$  were used for cytopsin, and photomicrographs from cytopsin preparation stained with May-Grünwald-Giemsa (to show the morphology. (c, d and e, respectively).  $CD3^+CD11b^+TCR\alpha\beta^-$  and  $CD3^+CD11b^+TCR\alpha\beta^+$  sorted cells were restimulated with BCG MOI for 1 36 h, and TNF, IL-6 and IL-10 were measured in the supernatant. A pool of liver cells was used from individual genotypes (WT 2 mice, TNFR1 KO 4 mice and TNFR2-T KO 3 mice), after 2-weeks post-infection.

# BCG infection

## TNFR1

## TNFR2

### **MYELOID**

TNF, IL-6, IL-10  
CD3+ myeloid cells  
CD4/CD8, NK, macroph

### LIVER INJURY

### **MYELOID**

IL-6

### **LYMPHOID**

TNF, IL-6, IL-10  
CD3+ myeloid cells  
CD4/CD8, NK, Treg,

### GRANULOMA FORMATION

### **LYMPHOID**

TNF  
Treg function

**Supplementary Fig. S7. Schematic representation of the effects of TNFR1 or TNFR2 cell specific expression on myeloid or on lymphoid cells.** Myeloid cell TNFR1 plays a role in both liver injury and cell recruitment to form granulomas. Lymphoid cell TNFR1 only plays a role in granuloma formation. Myeloid cell TNFR2 influences liver injury mediated by IL-6. Lymphoid cell TNFR2 plays a role in Treg function.
